# Supplementary material for: Network structure of swollen iodine-doped poly(vinyl alcohol) amorphous domain as characterized by low field NMR
Source: Royal Society of Chemistry journal article supplement (doi:10.1039/d1sm00988e), 2021-01-01
Supplement: d1sm00988e1.pdf [file d1sm00988e1.pdf]

## Supporting Information

### Network Structure of Swollen Iodine-Doped Poly (Vinyl Alcohol) Amorphous Domain as Characterized by Low Field NMR

Yahui Li,<sup>a</sup> Junsheng Yang<sup>a,b</sup>, Hong Cheng<sup>a</sup>, Linkun Cai<sup>b</sup>, Ke Ye<sup>a</sup>, Zhijie Xia<sup>a</sup>, Qianlei Zhang<sup>a</sup>, Daoliang Wang<sup>a</sup> and Wei Chen<sup>\*a</sup>

<sup>a</sup> *National Synchrotron Radiation Laboratory, Anhui Provincial Engineering Laboratory of Advanced Functional Polymer Film, CAS Key Laboratory of Soft Matter Chemistry, University of Science and Technology of China, Hefei 230026, China.*

<sup>b</sup> *South China Advanced Institute for Soft Matter Science and Technology, School of Molecular Science and Engineering, Guangdong Provincial Key Laboratory of Functional and Intelligent Hybrid Materials and Devices, and State Key Laboratory of Luminescent Materials and Devices, South China University of Technology, Guangzhou 510640, China.*

---

\* Correspondence author: [wc003@ustc.edu.cn](mailto:wc003@ustc.edu.cn)

The comparison of the crystallinity of swollen and dry films.

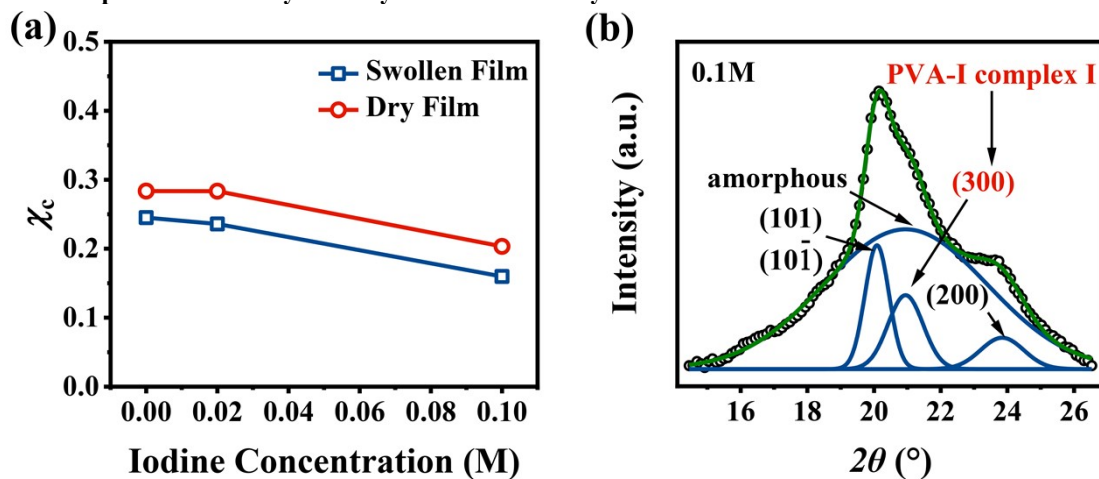

Fig. S1. (a)  $\chi_c$  of swollen and dry dyeing films as a function of iodine concentration. (b) The multi-peak fitting of the 1D WAXS curves of the swollen dyeing film (0.1M), the wavelength of this experiment is 0.154 nm.

$T_g$  of dry and swollen PVA films.

The swelling degree ( $SD$  (%)) is calculated by:

$$SD (\%) = \frac{w(sw)}{w(0)} * 100\% \quad (1)$$

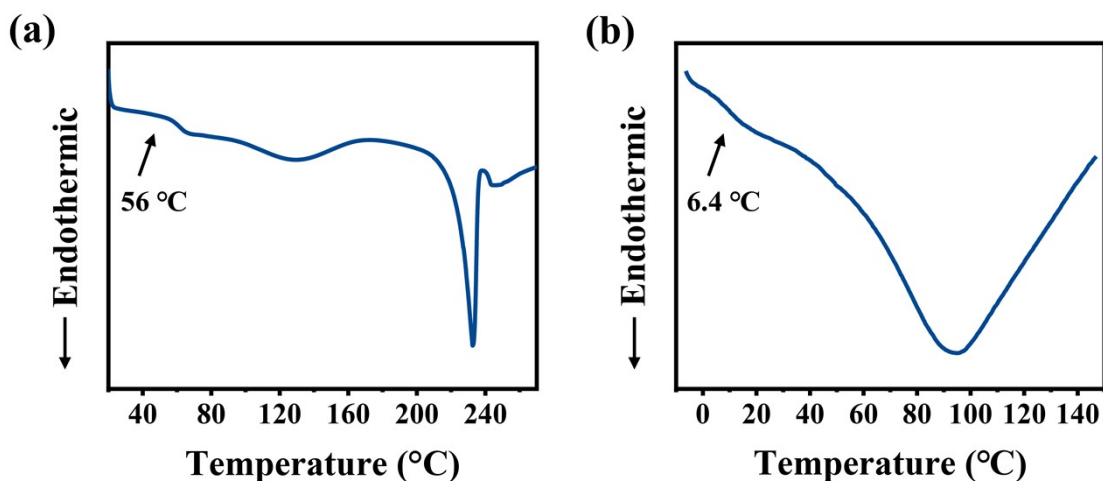

Fig. S2. DSC scans of sample (a) pure PVA film before swelling and (b) swollen PVA film with swelling degree ( $SD$ ) (%) = 115%.

The lattice parameters of different types of crystals.

The  $d$ -spacing was calculated as follows:<sup>1</sup>

$$d = \frac{\lambda}{2\sin \theta} \quad (2)$$

Table S1. Lattice spacing of diffraction peaks for PVA crystal (0-0.1 M).

| Crystal index | $2\theta$ ( $^\circ$ ) | $d$ ( $\text{\AA}$ ) |
|---------------|------------------------|----------------------|
| 100           | 11.6                   | 7.62                 |
| 001           | 15.21                  | 5.82                 |
| 101/101       | 19.64                  | 4.51                 |

|         |       |      |
|---------|-------|------|
| 200     | 23.15 | 3.84 |
| 201/201 | 27.99 | 3.18 |

**Table S2.** Lattice spacing of diffraction peaks for PVA-complex I (0.1 M-1 M).

| Crystal index | $2\theta$ (°) | $d$ (Å) |
|---------------|---------------|---------|
| 100           | 7.78          | 11.35   |
| 002           | 13.76         | 6.43    |
| 300           | 20.98         | 4.23    |
| 303/404/204   | 31.4          | 2.85    |

**Table S3.** Lattice spacing of diffraction peaks for PVA-complex II (1 M-5 M).

| Crystal index | $2\theta$ (°) | $d$ (Å) |
|---------------|---------------|---------|
| 100           | 8.96          | 9.86    |
| 001           | 11.6          | 7.62    |
| 101/101       | 14.69         | 6.02    |
| 200           | 18.2          | 4.87    |
| 201/201       | 21.58         | 44.11   |
| 002           | 23.15         | 3.84    |
| 102           | 25.15         | 3.54    |
| 300           | 27.58         | 3.23    |
| 301/202       | 29.95         | 2.98    |

## Reference

1. W. H. Bragg and W. L. Bragg, *Proceedings of the Royal Society of London. Series A, Containing Papers of a Mathematical and Physical Character*, 1913, **88**, 428-438.
